# Supplementary material for: Phytocannabinoids Reduce Inflammation of Primed Macrophages and Enteric Glial Cells: An In Vitro Study
Source: MDPI journal article supplement (doi:10.3390/ijms241914628), 2023-09-27
Supplement: s1 [file s1]

## Supplemental Figures, Table and Sequencing information

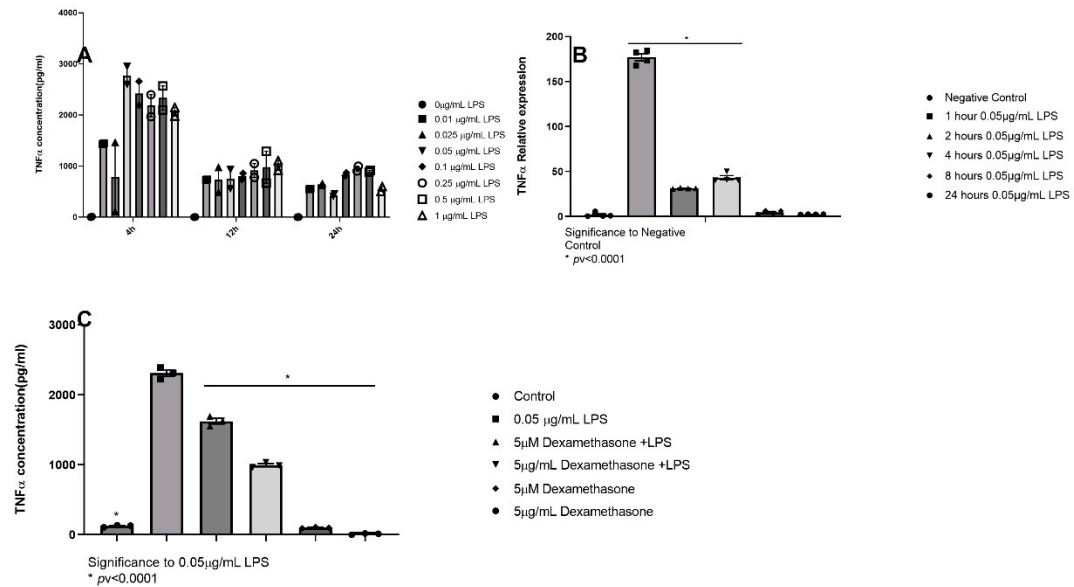

Figure S1: Calibration of maximal LPS induced TNF $\alpha$  secretion and expression in J77A1 macrophages and maximal reduction of TNF $\alpha$  by dexamethasone. Macrophages were incubated with different concentration of LPS and media was removed for analysis at different times. A. 0.01-1  $\mu$ g/mL LPS at 4, 12 and 24h. B. TNF $\alpha$  relative expression with 0.05  $\mu$ g/mL at 1, 2, 4, 8, 24h, measured by RTqPCR. C. concentration of 5  $\mu$ M and 5  $\mu$ g/mL were added to cells with or w/o incubation of 4h with LPS.  $n=4$ , all samples were compared to positive control Dunnett's multiple comparison test.

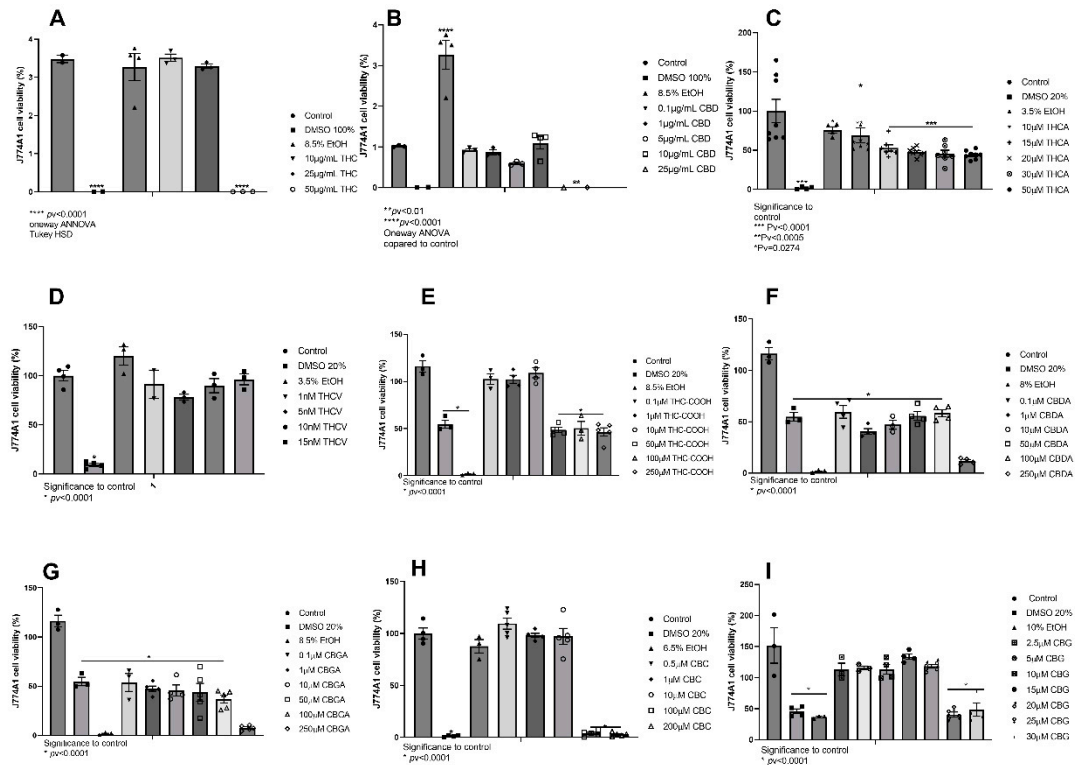

Figure S2: Cell viability on J774A1 cells were incubated with medium containing synthetic cannabinoids for 24h and then placed for 2h with 0.5mg/mL MTT 3-(4,5-dimethylthiazol-2-yl)-2,5-diphenyltetrazolium bromide. Non-treated cells served as positive control 100% DMSO-negative control, all cannabinoids were dissolved in EtOH, EtOH was added to volume equivalent to the highest cannabinoid. Absorbance was read at 550nm. A. 10-50 $\mu$ g/mL THC, B. 0.1-25 $\mu$ g/mL CBD, C. 10-50 $\mu$ M THCA, D. 1-15nM THCV, E. 0.1-250 $\mu$ M THC-COOH, F. 0.1-250 $\mu$ M CBDA, G. 0.1-250 $\mu$ M CBGA, H. 0.05-200 $\mu$ M CBC, I. 2.5-30 $\mu$ M CBG. n=4, all samples were compared to positive control Dunnett's multiple comparison test.

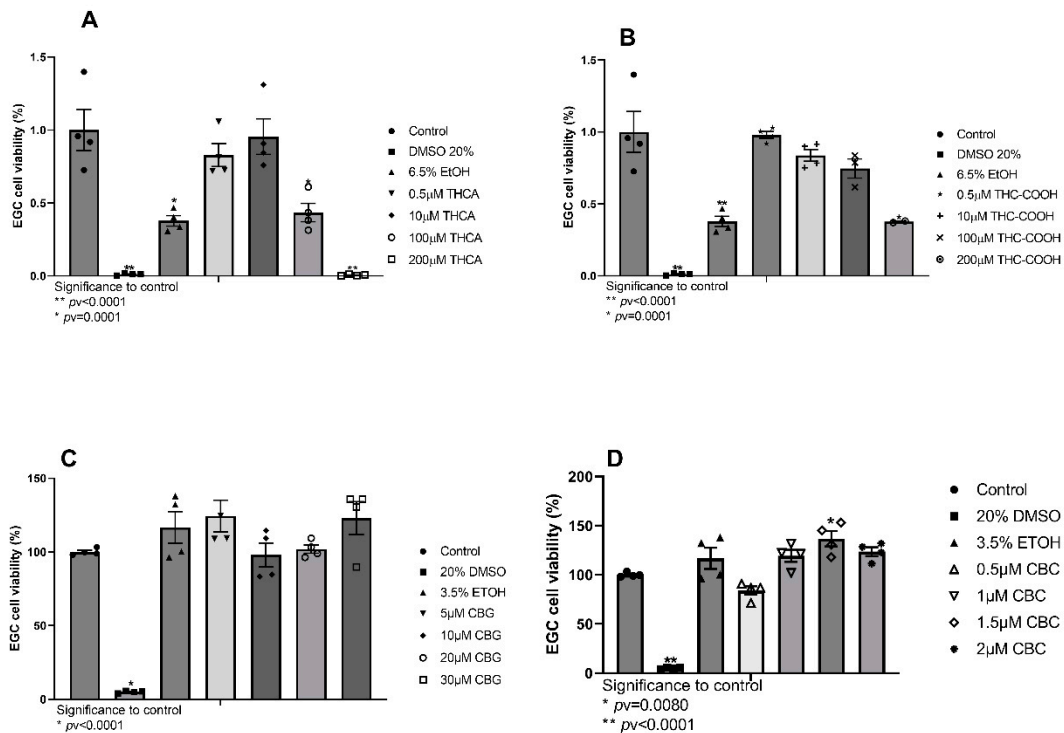

Figure S3: Cell viability on EGCs were incubated with medium containing synthetic cannabinoids for 24h and then placed for 2h with 0.5mg/mL MTT 3-(4,5-dimethylthiazol-2-yl)-2,5-diphenyltetrazolium bromide. Non-treated cells served as positive control 100% DMSO-negative control, all cannabinoids were dissolved in EtOH, EtOH was added to volume equivalent to the highest cannabinoid. A. 0.5-200μM THCA, B. 0.5-200μM THC-COOH, C. 5-30μM CBG, D. 0.5-2μM CBC. . n=4, all samples were compared to positive control Dunnett's multiple comparison test.

To summarize toxicity on both J774A1 murine macrophages and rat EGC by MTT assay [46] (Fig S2 and Fig S3). For J774A1 macrophages THC was not toxic in the range of 0.5-10μg/mL, CBD 10-50μM, THCA 1-20μM, THC-COOH 0.1-50μM, CBC 1-10μM, CBG 2.5-20μM, THCV 1-15nM, CBD 1-10μg/mL, CBDA, CBGA solution significantly decreased J774A1 cell viability more than 50% at all the concentrations that were tested (Fig S2),. Cell viability was not decreased in EGC at the following concentrations; THCA 0.5-10 μM, THC-COOH 0.5-100μM, CBG 5-30μM, CBC 0.5-2μM.

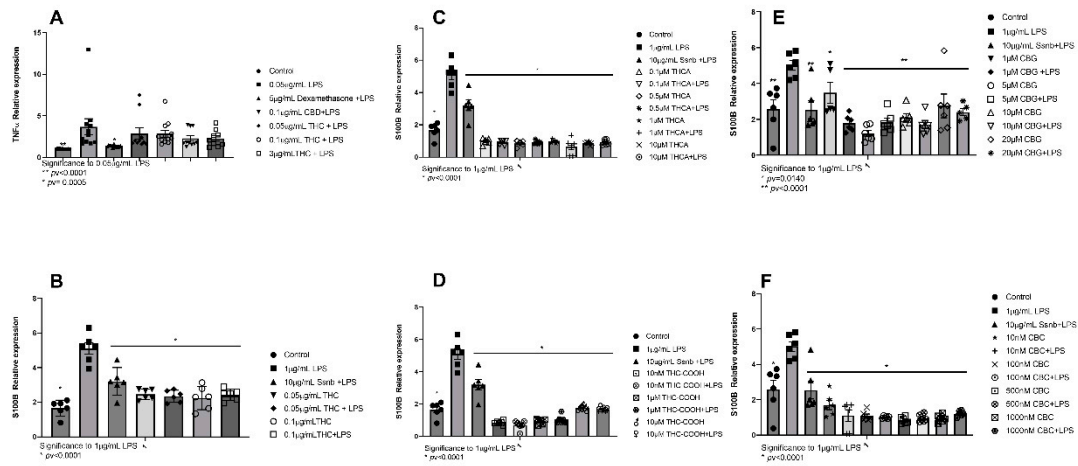

Figure S4: J774A1 and EGC were incubated for 1h with synthetic cannabinoids and then with 0.05μg/mL LPS for J774A1 and 0.1μg/mL for EGC. Dexamethasone was used as positive control for J774A1 cells and Ssnb for EGC. Relative expression was measured using RTqPCR. A. Relative expression of *Tnfa* gene after incubation with 0.1-3μg/mL THC and 1μg/mL LPS, B. Relative expression of *S100B* gene after incubation with 0.05-0.1μg/mL THC with and w/o 1μg/mL LPS. C. Relative expression of *S100B* after incubation with 0.01-10μM THCA with and w/o 1μg/mL LPS. D. Relative expression of *S100B* after incubation with 10nM-10μM of THC-COOH with or w/o 1μg/mL LPS. E. Relative expression of *S100B* after incubation with 1-20μM of CBG with or w/o 1μg/mL LPS. F. Relative expression of *S100B* after incubation with 10-1000nM CBC with or w/o 1μg/mL LPS. A n=12, B-F n=6. All samples were compared to positive control Dunnett's multiple comparison test.

Table S1: Primers used for RTqPCR

| Name           | Forward                   | Reverse                    | Accession       |
|----------------|---------------------------|----------------------------|-----------------|
| m-PPIA         | GGGTCCTCCTTTACAGAA<br>A   | GATGCCAGGACCTGTATG<br>CT   | NM_008907       |
| m-TNF $\alpha$ | GTCTGTGCCTCAGCCTCTTC      | GCTTGGTGGTTTGCTACG<br>AC   | U68414.1        |
| r-GAPDH        | TGAGGTGACCGCATCTTCT<br>TG | TGGTAACCAGGCGTCCGA<br>TA   | AF106860.2      |
| r- S100B       | CAGGAGCCTCCGGATGT         | TCCTGCTCTTTGATTTCTT<br>CCA | NM_013191.<br>2 |
| r-GFAP         | TCCTGGAACAGCAAAACA<br>AG  | CAGCCTCAGGTTGGTTTC<br>AT   | Z48978.1        |

All sequencing data (GEO Submission (GSE240225) [NCBI tracking system  
#24220033] is available at

<https://www.ncbi.nlm.nih.gov/geo/query/acc.cgi?acc=GSE240225>
